1 **TITLE**

2 Physiological control of bioluminescence in a deep-sea planktonic worm,

3 *Tomopteris helgolandica* Greeff, 1879

4

5 **RUNNING TITLE**

6 *Tomopteris*' bioluminescence control

7

8 **AUTHORS**

9 Gouveneaux Anaïd\*, Mallefet Jérôme

10 \* Corresponding author : [anaid.gouveneaux@uclouvain.be](mailto:anaid.gouveneaux@uclouvain.be)

11 (+32) 10 47 34 77

12 Marine Biology Laboratory, Earth and Life Institute, Catholic University of Louvain, Place Croix du

13 Sud 3, Louvain-la-Neuve 1348, Belgium

14

15 **SUMMARY**

16 *Tomopteris helgolandica* Greeff 1879 (Tomopteridae) is a transparent holoplanktonic polychaete that  
17 can emit a bright light. In this work, we investigated the emission pattern and control of this deep-sea  
18 worm's luminescence.

19 Potassium chloride depolarisation applied on anaesthetised specimens triggered a maximal yellow light  
20 emission from specific parapodial sites, suggesting that a nervous control pathway was involved. A  
21 pharmacological screening revealed a sensitivity to carbachol, which was confirmed by a dose-light  
22 response associated with a change in the light emission pattern, where physiological carbachol  
23 concentrations induced flashes and higher concentrations induced glows. The light response induced  
24 by its hydrolysable agonist, acetylcholine, was significantly weaker but was facilitated by eserine  
25 pretreatment. In addition, a specific inhibitory effect of tubocurarine was observed on carbachol-  
26 induced emission. Lastly, KCl- and carbachol-induced light responses were significantly reduced  
27 when preparations were pre-incubated in Ca<sup>2+</sup>-free artificial sea water or in different calcium channel  
28 blockers (verapamil, diltiazem) and calmodulin inhibitor (trifluoperazine) solutions. All of these

29 results strongly suggest that *T. helgolandica* produces its light flashes *via* activating nicotinic  
30 cholinergic receptors and a calcium-dependent intracellular mechanism involving L-type calcium  
31 channels.

32

## 33 INTRODUCTION

34 Planktonic organisms can achieve almost perfect invisibility *via* transparency, making it one of the  
35 most valuable and fascinating adaptations to pelagic environments (Johnsen and Widder, 1998).  
36 Paradoxically, at first sight, some of these cryptic organisms are also brightly luminous (Haddock and  
37 Case, 1999; Poupin *et al.*, 1999).

38 The tomopterid holoplanktonic polychaetes belong to a particularly diverse family that is extremely  
39 transparent (Johnsen and Widder, 1998) and include at least 11 bioluminescent species (Poupin *et al.*,  
40 1999). Although the spectral distribution has been measured in only two species ( $\lambda_{\max}$ = 565 nm for  
41 *Tomopteris nissenii* Rosa, 1908 and  $\lambda_{\max}$ = 570 nm for *T. septentrionalis* Quatrefages, 1865) (Dales,  
42 1971; Latz *et al.*, 1988), these pelagic worms are often described as yellow emitters as opposed to  
43 most bioluminescent marine organisms that emit a blue-green light. Additionally, given the species-  
44 specific luminous organ distribution observed in this family, this unusual luminescence has been  
45 suggested to be an intraspecific communication signal (Harvey, 1952; Dales, 1971; Latz *et al.*, 1988).  
46 However, since the review of Dales (1971), this elegant hypothesis is often highlighted despite a lack  
47 of evidence because basic experimental data are missing such as emission pattern and associated  
48 physiological control mechanisms. Here, we focused on these fundamental aspects and presented a  
49 pharmacological approach of the luminescence control of *T. helgolandica* Greeff, 1879, a widespread,  
50 previously established bioluminescent East Atlantic species (Harvey, 1952).

51

## 52 MATERIAL AND METHODS

### 53 Organisms' collection

54 *T. helgolandica* specimens (1.5-6.0 cm in length), were collected from October 2010 to November  
55 2012 at a 200-300 m depth from two connected fjords, Raunefjorden and Korsfjorden (Western  
56 Norway), using two types of towed net samplers: the Isaacs-Kidd midwater trawl (1.75 m wide x 1.30

57 m high mouth, 6.5 m long, 500  $\mu\text{m}$  mesh aperture) or ring plankton nets (1.5 m diameter mouth, 300  
58  $\mu\text{m}$  mesh aperture) depending on the weather and the vessel's equipment. Live specimens were housed  
59 in classical aquariums or in kreisel tanks commonly used for maintaining gelatinous zooplankton  
60 (Baker, 1963; Raskoff *et al.*, 2003) in a permanent dark cold room (6-8°C) at the Espesgrend Marine  
61 Biological Station of the University of Bergen.

62

### 63 **Anesthesia**

64 Several anesthetics that were previously used on polychaetes (Smaldon and Lee, 1979; Costa-Paiva *et*  
65 *al.*, 2007; Ross and Ross, 2008; Cooper, 2011) including magnesium chloride, propylene phenoxetol  
66 and tricaine mesylate were unsuccessful with *T. helgolandica*. However, preliminary experiments  
67 demonstrated that menthol efficiently anesthetised the animals within 30 min and reduced the  
68 interindividual variability of the emitted light compared to non-treated specimens without affecting  
69 light emission parameters. Thus, before each experiment, the organisms were relaxed for 30 min in a  
70 menthol solution applied at increasing concentrations (0.25 - 2.5  $\text{g l}^{-1}$ ).

71

### 72 **Pharmacology**

73 The organisms were dissected from the head to the tail into serial preparations that comprised three  
74 parapod pairs. Each preparation was placed into 50  $\mu\text{l}$  of artificial sea water (400.4  $\text{mmol l}^{-1}$  NaCl, 9.6  
75  $\text{mmol l}^{-1}$  KCl, 52.3  $\text{mmol l}^{-1}$   $\text{MgCl}_2$ , 9.9  $\text{mmol l}^{-1}$   $\text{CaCl}_2$ , 27.7  $\text{mmol l}^{-1}$   $\text{Na}_2\text{SO}_4$ , 20  $\text{mmol l}^{-1}$  Tris, final  
76 pH 8.3). Next, light production was triggered by adding 50  $\mu\text{l}$  of a given test solution. For each studied  
77 specimen, one preparation was treated with the control stimulus (200  $\text{mmol l}^{-1}$  KCl or, depending on  
78 the tested effect and based on preliminary results, 1  $\text{mmol l}^{-1}$  cholinergic agonist) whereas the other  
79 specimens were treated with different pharmacological substances (Table 1). The light responses were  
80 standardised and expressed as a percentage of the control light response. All of the experiments were  
81 designed following the Latin square principle: from one specimen to another, the preparation from an  
82 identical position is never treated twice by the same solution to eliminate possible interindividual or  
83 interpreparation variability. The pharmacological solutions were prepared in artificial sea water  
84 buffered at pH 8.3 just before the experiments were performed. The light intensity was measured for

85 10-20 min with a single tube luminometer (FB12, 2005, Berthold technologies). To avoid light stress  
86 or artefactual measurements, all handling and experiments were performed in partial darkness or under  
87 red lighting.

88

## 89 **Statistics**

90 All of the statistical analyses were performed with JMP software (v 10.0.0, 2012, SAS Institute Inc.)  
91 on log-transformed data ( $\sum \log(x_{(1 \rightarrow n)})/n$ ) for relative values  $> 1$ . Variance normality and equality were  
92 previously tested by the Shapiro-Wilk test and Levene's test, respectively. When these parametric  
93 assumptions were not met, a one-way ANOVA was replaced by a non-parametric Kruskal-Wallis  
94 ANOVA to assess the significant difference between more than two groups. All of the pairwise  
95 comparisons were tested using a *post hoc* Student's t-test (each pair), Dunnett's test (with control) or a  
96 *post hoc* Dunn's test, as appropriate. Each difference was considered to be significant at 0.05. For  
97 clarity, the graphically illustrated values are expressed as the geometric means ( $\sqrt{(x_1 * x_2 * \dots * x_n)}$ ) with  
98 the corresponding s.e.m..

99

## 100 **RESULTS**

### 101 **Light emission pattern**

102 When applied on whole specimens, potassium chloride (200 mmol l<sup>-1</sup> KCl) triggered a maximal  
103 yellow light emission at specific parapodial sites and locally reached 10<sup>3</sup> Mq s<sup>-1</sup> (Fig. 1A, C). Due to a  
104 linear relationship between the total emitted light ( $L_{tot}$ ) and the maximal light intensity ( $L_{max}$ ) of the  
105 control light responses (Fig. 1B), only the  $L_{tot}$  is presented.

106

### 107 **Screening of neurotransmitters**

108 The primary neurotransmitter families known to mediate bioluminescence throughout invertebrates  
109 were pharmacologically screened on *T. helgolandica*'s parapods (Nicol, 1960; Case and Strause, 1978;  
110 Anctil, 1979; Gardner and Walker, 1982; Anctil, 1987; Walker *et al.*, 1996) (Table 2). Only carbachol  
111 elicited a luminescence higher than the ASW-induced emission (mechanical stimulus).

112

### 113 **Extrinsic cholinergic control**

114 The amount of emitted light increased with increasing carbachol concentrations (Fig. 3A), and  
115 different emission patterns were observed at various concentrations. At low carbachol concentrations,  
116 the pattern consisted of a series of weak intensity flashes (Fig. 2A, top left panel), which was in  
117 contrast with the monophasic shape of 1 mmol l<sup>-1</sup> carbachol light emission (Fig. 2A, top right panel)  
118 that is similar to a KCl-induced light response (Fig. 1A). However, the tissue preparations generally  
119 responded poorly to acetylcholine compared to its non-hydrolysable agonist, carbachol. Thus, an  
120 eserine pretreatment was tested. This cholinesterase inhibitor induced a weak light response (0.04 ±  
121 0.03 % of KCl) and significantly facilitated acetylcholine-induced emission but did not affect  
122 carbachol-induced light emission (Fig. 2B). Lastly, the specificity of the cholinergic receptors was  
123 evaluated using nicotinic and muscarinic blocking agents, tubocurarine and atropine, respectively  
124 (Table 1). Only tubocurarine significantly inhibited carbachol-induced emission (Fig. 2C). This  
125 observation was confirmed with the nicotinic agonist DMPP which triggered an intense light emission  
126 (9519.55 ± 8490.38 % of KCl).

127

### 128 **Intrinsic control: calcium requirement**

129 Given that the nicotinic control pathway suggests that Ca<sup>2+</sup> is a second messenger, we aimed to  
130 investigate the calcium-dependence of the reaction. Preincubating the tissue preparations in Ca<sup>2+</sup>-free  
131 artificial sea water significantly inhibited the KCl- and carbachol-induced luminescence responses by  
132 95 and 100 %, respectively (Fig. 3A). The luminescence was also significantly reduced by different  
133 calcium channel blockers, verapamil (phenylalkylamines) and diltiazem (benzothiazepine), and by  
134 trifluoperazine, a calmodulin inhibitor (Fig. 3B).

135

## 136 **DISCUSSION**

137 Although some bioluminescent organisms produce a continuous glow, most light emission signals are  
138 transient events mediated by specific control mechanisms (Nicol, 1960). Two control levels are  
139 commonly distinguished: an extrinsic control represented by peripheral control pathways and an

140 intrinsic control that includes the photogenic reaction and the related intracellular signalling pathways  
141 (Case and Strause, 1978). In self-luminescent metazoans characterised by differentiated photogenic  
142 structures, emission is either controlled by hormones (Claes and Mallefet, 2009) or *via* coupling  
143 mechanisms between photocytes and excitable cells, including neural, muscular or epithelial cells  
144 (Herring and Morin, 1978; Anctil, 1987; Hastings and Morin, 1991; Krönström *et al.*, 2009). Although  
145 luminescence can originate in a nerve-free bioluminescent epithelium, such as in the conducting  
146 epithelia of some Hydrozoa (Bassot *et al.*, 1978; Dunlap *et al.*, 1987) and Anthozoa (Germain and  
147 Anctil, 1996), it is most frequently controlled by neural pathways (Nicol, 1960; Case and Strause,  
148 1978). In addition to turning the light emission on and off, nervous control abilities can modulate and  
149 adjust the intensity, duration, frequency or angular distribution of a light signal and thus generate  
150 diversity and specificity. However, a large proportion of the functional diversity of the existing  
151 emission patterns and control systems is unknown, especially in annelids, where the most detailed  
152 bioluminescence control studies have been limited to polynoid and chaetopterid benthic species  
153 (Gardner and Walker, 1982; Anctil, 1987). Therefore, the luminescence control of pelagic species  
154 worms has been poorly documented (Harvey, 1952; Haddock *et al.*, 2010).

155 According to our results, *T. helgolandica*'s luminescence is under nervous control, as revealed by  
156 yellow luminescence induced by KCl depolarisation in nervous fibres, which directly or indirectly  
157 causes a photogenic structure response (De Bremaeker *et al.*, 1996). Furthermore, the pharmacological  
158 screen revealed a dose-dependent carbachol sensitivity. In fact, carbachol and acetylcholine both  
159 induced light emission, but the tissue preparations demonstrated a low responsiveness to acetylcholine.  
160 Pharmacological carbachol concentrations (over 0.1 mmol l<sup>-1</sup>) elicited a monophasic signal, similar to  
161 KCl-induced light emission, but acetylcholine 1 mmol l<sup>-1</sup> failed to elicit such a pattern. However, an  
162 eserine pretreatment significantly facilitated acetylcholine-induced emission, which attained intensities  
163 emitted by low carbachol concentrations (< 0.1 mmol l<sup>-1</sup>, nearest physiological concentrations) and  
164 suggested an involvement of cholinesterase activity. Lastly, the flash trains ( $L_{\max} = 400 \text{ Mq s}^{-1}$ )  
165 observed at the lowest concentrations were likely more representative of the naturally expressed  
166 signal. The specific inhibitory effect of tubocurarine on carbachol-induced emission not only indicates  
167 an involvement of the cholinergic pathway but also demonstrates the nicotinic receptor prevalence.

168 These observations were comforted by the sensitivity of the samples to the nicotinic agonist DMPP  
169 and by their calcium-dependent light response which suggested that L-type calcium channels were  
170 also involved. *T. helgolandica* produces yellow flashes from each parapod through neural control that  
171 activates nicotinic cholinergic receptors and a calcium-dependent intrinsic mechanism.

172 Numerous and widespread cholinergic control mechanisms exist in annelids (Gardner and Walker,  
173 1982; Walker *et al.*, 1996). Their control of bioluminescence is relatively well established in  
174 Polynoidae and Chaetopteridae (Nicolas *et al.*, 1978; Gardner and Walker, 1982; Anctil, 1987) and is  
175 reinforced by the present study of one Tomopteridae. However, because of its ubiquity, the specific  
176 mode, level and site of action of acetylcholine in the bioluminescent process remain unclear.

177 Muscarinic cholinergic and serotonergic mechanisms have been described in benthic scale-worms  
178 (Polynoïdae) as part of the excitatory pathway of elytral luminescence (Nicol, 1954; Nicolas *et al.*,  
179 1978; Miron *et al.*, 1987; Anctil *et al.*, 1989). The tube-worm *Chaetopterus variopedatus*  
180 (Chaetopteridae) produces a glowing blue mucus in response to the contractile action of the adjacent  
181 epithelio-muscular cells, which are controlled by muscarinic cholinergic and GABAergic pathways  
182 (Nicol, 1952; Anctil, 1981; Martin and Anctil, 1984; Anctil, 1987). Given that some photocytes in  
183 others organisms are not directly innervated but are controlled by adjacent supportive cells that trigger  
184 light emission by epithelial conduction (Anctil, 1987; Dunlap *et al.*, 1987), the calcium entry *via* L-  
185 type channels we observed could act at both the neuro-photocyte level and an intermediate level. The  
186 presence parapod nerve fibres, revealed by the histological studies of Greeff (1882; 1885) and  
187 Bonhomme (1952) on *T. mariana* and *T. kefersteini*, respectively, suggested that the bioluminescence  
188 of these worms was under nervous control. In particular, Greeff exhibited a scheme of photogenic  
189 organs with direct nerve connections. However, the characterisation of photogenic structures remains  
190 ambiguous (Malaquin and Carin, 1922; Bonhomme, 1952).

191 Despite the differences observed in the light emission pattern, their control and the bioluminescence  
192 characteristics between polynoid and chaetopterid worms, the luminescence have been associated with  
193 defensive functions. The same hypothesis has been suggested for the blue luminescence of the benthic  
194 polychaete *Polycirrus perplexus* (Terebellidae) (Huber *et al.*, 1989) and for the ‘green bombs’  
195 expelled by recently described deep-sea pelagic specimens belonging to Acrocirridae, (Osborn *et al.*,

196 2011). Lastly, only syllid worms, whose behaviour has been well-studied, use their green light  
197 emission for both deterrence and intraspecific communication during mating swarms (Wilkins and  
198 Wolken, 1981; Tsuji and Hill, 1983; Fischer and Fischer, 1995; Gaston and Hall, 2000; Deheyn and  
199 Latz, 2009). Given that the open ocean does not facilitate contact between planktonic organisms, an  
200 atypical emission wavelength would be highly advantageous for Tomopteridae. Although the emission  
201 of yellow light has been interpreted by numerous authors as a specific signal that involves a private  
202 communication channel (Harvey, 1952; Dales, 1971; Latz *et al.*, 1988), the maximal wavelength of *T.*  
203 *septentrionalis* ( $\lambda_{\max} = 570$  nm) does not match its spectral sensitivity, which is centred on blue  
204 (Buskey and Swift, 1985).

205 Nevertheless, it is likely that *T. helgolandica*'s yellow light may play different roles, as suggested by  
206 the observation of different emission patterns - flash against glow - according to the stimulus applied.  
207 Flash is often associated with a deterrent function, whereas glows are considered attractive, suggesting  
208 that the worm modulate the light output depending on the context that incites bioluminescence use.  
209 However, in the absence of further experimental data, this hypothesis remains speculative.

210

## 211 **CONCLUSION**

212 Our results strongly support the hypothesis that *T. helgolandica*'s bioluminescence is under nervous  
213 control, revealing new insight into the pathways involved. The yellow light flashes are produced *via*  
214 activation of nicotinic cholinergic receptors and a calcium-dependent intracellular mechanism  
215 involving L-type calcium channels.

216 However, the understanding of tomopterids' bioluminescence at an ecological level is beyond our  
217 current knowledge. In addition to studying the intrinsic mechanisms of light emission, an assessment  
218 of the mechanisms that govern their visual capabilities as well as their reproductive biology and  
219 behaviour will be performed in our future research.

220

## 221 **ACKNOWLEDGEMENTS AND FUNDING**



222 This research was supported by a FRIA research grant (A.G.) and FRFC: 2.4525.12, FNRS, Belgium.  
 223 J.M. is an FNRS research associate. This is a contribution to the Biodiversity research Centre of the  
 224 Earth and Life Institute (UCL) and to the CIBIM. We thank the Espeyend Marine Biological Station  
 225 of the University of Bergen and the Technological Platform of Statistical Methodology and  
 226 Computing Support of the Catholic University of Louvain.

227

228 **LEGENDS**

| drug            |                                                         |                                               | concentration           |
|-----------------|---------------------------------------------------------|-----------------------------------------------|-------------------------|
| usual name      | commercial name                                         | pharmacology                                  | (mmol l <sup>-1</sup> ) |
| KCl             | potassium chloride                                      | depolarizing agent                            | 200                     |
| serotonin       | 5-hydroxytryptamine                                     | serotonergic neurotransmitter                 | 1                       |
| epinephrine     | (±)-epinephrine                                         | adrenergic neurotransmitter                   | 1                       |
| GABA            | gamma-aminobutyric acid                                 | GABAergic neurotransmitter and neuromodulator | 1                       |
| nitric oxide    | sodium nitroprusside                                    | guanylyl cyclase activator                    | 1                       |
| carbachol       | carbamoylcholine chloride                               | cholinergic agonist                           | 1                       |
| DMPP            | 1,1-dimethyl-4-phenyl-piperazinium iodide acetylcholine | nicotinic agonist                             | 1                       |
| acetylcholine   | chloride                                                | cholinergic neurotransmitter                  | 1                       |
| eserine         | eserine                                                 | cholinesterase inhibitor                      | 1                       |
| tubocurarine    | d-tubocurarine chloride                                 | cholinergic nicotinic receptor antagonist     | 1                       |
| atropine        | atropine sulfate                                        | cholinergic muscarinic receptor antagonist    | 1                       |
| nifedipine      | nifedipine                                              | calcium channel blocker                       | 1                       |
| diltiazem       | diltiazem chloride                                      | calcium channel blocker                       | 1                       |
| trifluoperazine | trifluoperazine dihydrochloride                         | calmodulin inhibitor                          | 1                       |
| verapamil       | (±)-verapamil                                           | calcium channel blocker                       | 1                       |

229

230 **Table 1.** Detailed list of chemical and pharmacological substances (Sigma-Aldrich Co.) used in  
 231 experiments aimed at assessing the nervous control of luminescence in *Tomopteris helgolandica*.

232

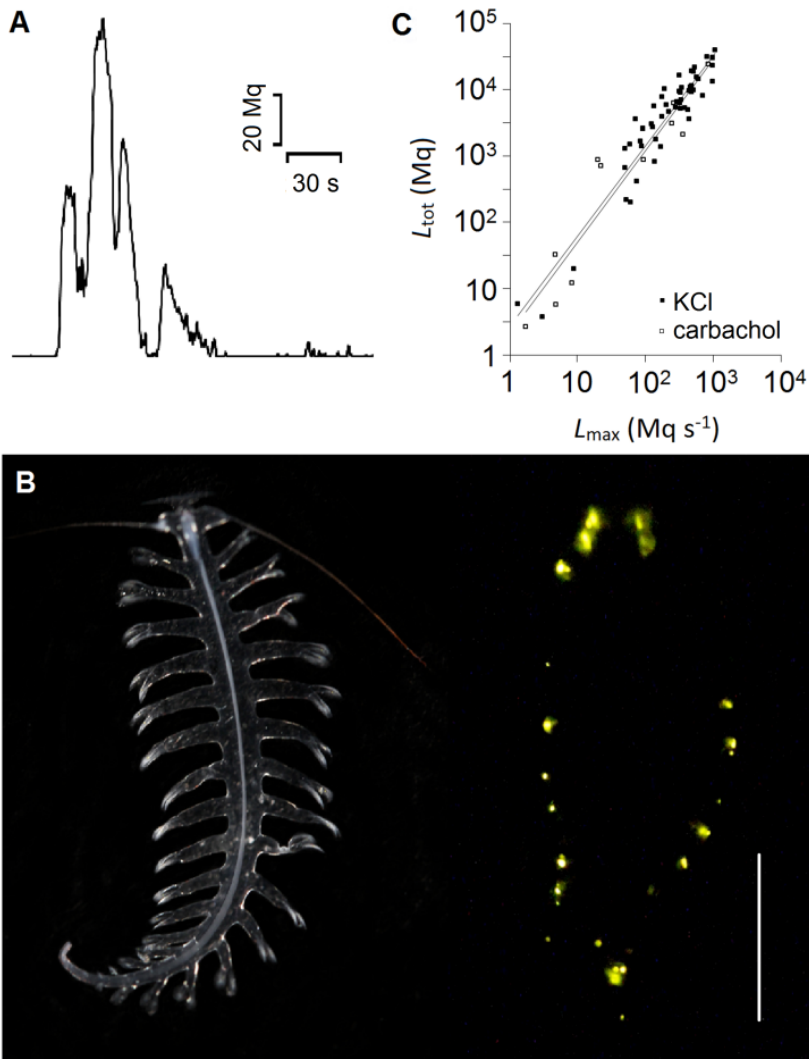

233

234 **Fig. 1.** Light emission pattern of *T. helgolandica*.

235 (A) Typical curve shape of maximal KCl-induced light emission. (B) *T. helgolandica* was

236 photographed in natural light and its KCl-induced bioluminescence was photographed in the dark.

237 Scale bar, 1 cm. (C) Linear relationship between the total quantity of light emitted ( $L_{\text{tot}}$ ) and the

238 maximal light intensity ( $L_{\text{max}}$ ) for 200 mmol l<sup>-1</sup> KCl- and 1 mmol l<sup>-1</sup> carbachol-induced luminescence.

239 Mq = megaquanta = 10<sup>6</sup> photons. R<sup>2</sup>-values are 0.8944 and 0.8822 respectively, and the slopes ( $p =$

240 0.6921) and intercepts ( $p = 0.6609$ ) are significantly equal.

241

| drug          | $L_{tot}$<br>(% KCl) | p-value | n |
|---------------|----------------------|---------|---|
| ASW (control) | 4.67 ± 4.22          |         | 5 |
| serotonin     | 16.56 ± 15.13        | 1.000   | 5 |
| epinephrine   | 53.71 ± 52.76        | 1.000   | 5 |
| GABA          | 15.76 ± 10.60        | 1.000   | 5 |
| nitric oxide  | 89.40 ± 79.55        | 1.000   | 4 |
| carbachol     | 1129.88 ± 482.90     | 0,2839  | 5 |

242

243 **Table 2.** Screening of neurotransmitters' effects on isolated tissue preparations of *T. helgolandica*.

244 The light intensities are expressed as a function of KCl-induced luminescence.

245

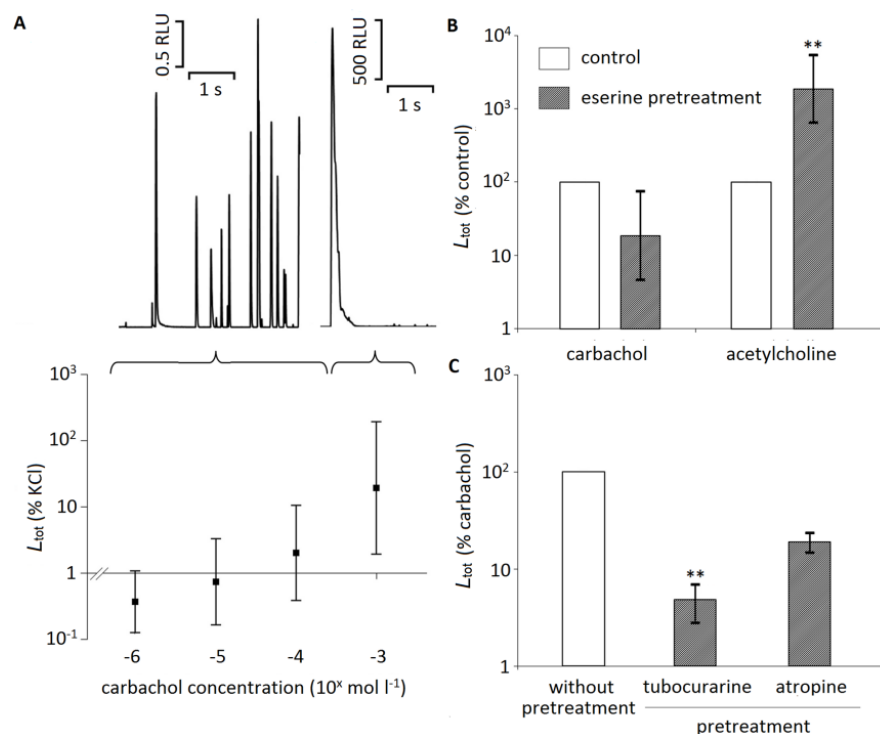

246

247 **Fig. 2.** Physiological control of bioluminescence in *T. helgolandica*.

248 (A) Carbachol dose-light response – the total quantity of light emitted during the experiment ( $L_{tot}$ ) is

249 expressed as a percentage of the value obtained with KCl application (theoretical physiological

250 maximum) – and parapod luminescent response patterns in response to low (top left) and high (top

251 right) carbachol concentrations. (B) Effect of an eserine pre-treatment on the luminescence induced by

252 carbachol and acetylcholine. The values represent the  $L_{tot}$  increase expressed as a percentage of each

253 activator injected alone (without eserine pre-treatment). Eserine significantly increased the  
 254 luminescent response to acetylcholine but did not affect carbachol-induced luminescence. (C) The  
 255 effect of atropine and tubocurarine pretreatments on carbachol-induced luminescence. Tubocurarine  
 256 significantly decreased the luminescent response to carbachol, but atropine did not significantly affect  
 257 this luminescence. (n=6; \*\* p<0.01).  
 258

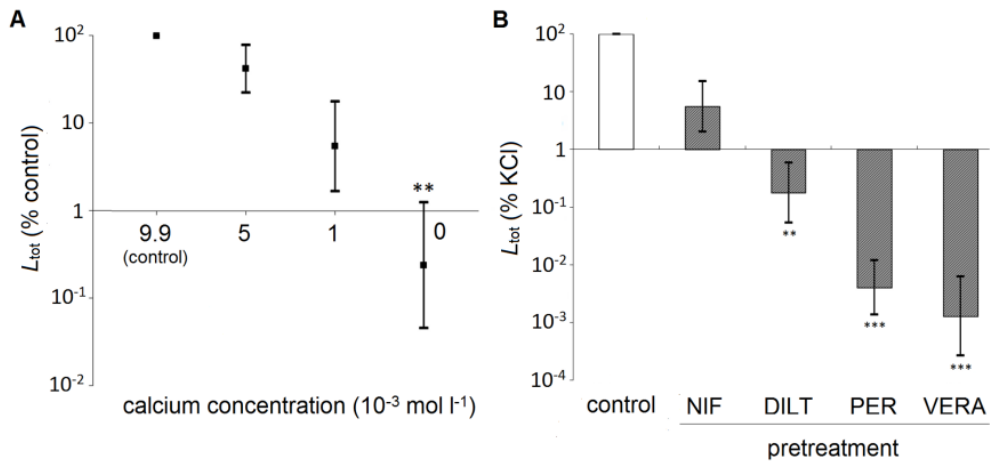

259

260 **Fig. 3.** Intrinsic control of bioluminescence in *T. helgolandica*.

261 (A) Dose-dependent inhibitory effect of calcium depletion. The values represent the  $L_{tot}$  decrease  
 262 expressed as a percentage of those obtained in complete artificial sea water (10 mmol l $^{-1}$ ). (B) The  
 263 effect of calcium organic inhibitors (NIF = nifedipine, DILT = diltiazem, PER = trifluoperazine,  
 264 VERA = verapamil) on KCl-induced luminescence. (n=6; \* p<0.05, \*\* p<0.01, \*\*\* p<0.001).

265

## 266 REFERENCES

267 **Anctil, M.** (1979). Physiological control of bioluminescence. *Photochemistry and Photobiology* **30**,  
 268 777-780.

269 **Anctil, M.** (1981). Luminescence control in isolated notopods of the tube-worm *Chaetopterus*  
 270 *variopedatus*: Effects of cholinergic and GABAergic drugs. *Comparative Biochemistry and*  
 271 *Physiology Part C: Comparative Pharmacology* **68**, 187-194.

- 272 **Anctil, M.** (1987). Neural control mechanisms in bioluminescence. *NATO ASI series. Series A: life*  
273 *sciences* **141**, 573-602.
- 274 **Anctil, M., Bassot, J.-M. and Nicolas, M.-t.** (1989). Effects of monoamines and related drugs on the  
275 bioluminescence of scale-worm elytra (Polychaeta, Polynoidae). *Comparative Biochemistry and*  
276 *Physiology Part C: Comparative Pharmacology* **93**, 127-135.
- 277 **Baker, A. C.** (1963). The problem of keeping planktonic animals alive in the laboratory. *Journal of*  
278 *the Marine Biological Association of the United Kingdom* **43**, 291-294.
- 279 **Bassot, J.-M., Bilbaut, A., Mackie, G., Passano, L. and De Ceccatty, M. P.** (1978).  
280 Bioluminescence and other responses spread by epithelial conduction in the siphonophore  
281 *Hippopodius*. *The Biological Bulletin* **155**, 473-498.
- 282 **Buskey, E. J. and Swift, E.** (1985). Behavioral responses of oceanic zooplankton to simulated  
283 bioluminescence. *The Biological Bulletin* **168**, 263.
- 284 **Bonhomme, C.** (1952). La Bioluminescence de quelques annélides méditerranéennes. (Etude  
285 histologique et histophysiologique). *Naturalia Monspeliensa* **2**, 7-137.
- 286 **Case, J. F. and Strause, L. G.** (1978). Neurally controlled luminescent systems. In *Bioluminescence*  
287 *in Action*, (ed. P. J. Herring), pp. 331-366. London, New York, San Francisco: Academic Press.
- 288 **Claes, J. M. and Mallefet, J.** (2009). Hormonal control of luminescence from lantern shark  
289 (*Etmopterus spinax*) photophores. *Journal of Experimental Biology* **212**, 3684-3692.
- 290 **Cooper, J. E.** (2011). Anesthesia, analgesia, and euthanasia of invertebrates. *ILAR J* **52**, 196-204.
- 291 **Costa-Paiva, E. M., Paiva, P. C. and Klautau, M.** (2007). Anaesthetization and fixation effects on  
292 the morphology of sabellid polychaetes (Annelida: Polychaeta: Sabellidae). *Journal of the Marine*  
293 *Biological Association of the United Kingdom* **87**, 1127-1132.
- 294 **Dales, R. P.** (1971). Bioluminescence in pelagic polychaetes. *Journal of the Fisheries Board of*  
295 *Canada* **28**, 1487-1489.

- 296 **Deheyn, D. D. and Latz, M. I.** (2009). Internal and secreted bioluminescence of the marine  
297 polychaete *Odontosyllis phosphorea* (Syllidae). *Invertebrate biology* **128**, 31-45.
- 298 **Dunlap, K., Takeda, K. and Brehm, P.** (1987). Activation of a calcium-dependent photoprotein by  
299 chemical signalling through gap junctions. *Nature* **325**, 60-62.
- 300 **Fischer, A. and Fischer, U.** (1995). On the life-style and life-cycle of the luminescent polychaete  
301 *Odontosyllis enopla* (Annelida: Polychaeta). *Invertebrate biology*, 236-247.
- 302 **Gardner, C. R. and Walker, R. J.** (1982). The roles of putative neurotransmitters and  
303 neuromodulators in annelids and related invertebrates. *Progress in Neurobiology* **18**, 81-120.
- 304 **Gaston, G. R. and Hall, J.** (2000). Lunar periodicity and bioluminescence of swarming *Odontosyllis*  
305 *luminosa* (Polychaeta: Syllidae) in Belize. *Gulf and Caribbean Research (formerly Gulf Research*  
306 *Reports)* **12**, 47-51.
- 307 **Germain, G. and Anctil, M.** (1996). Evidence for intercellular coupling and connexin-like protein in  
308 the luminescent endoderm of *Renilla koellikeri* (Cnidaria, Anthozoa). *The Biological Bulletin* **191**,  
309 353-366.
- 310 **Greeff, R.** (1882). Ueber die rosettenförmigen Leuchtorgane der Tomopteriden und zwei neue Arten  
311 von Tomopteris. *Zoologischer Anzeiger* **5**, 384-387.
- 312 **Greeff, R.** (1885). Ueber die pelagische Fauna an der Küsten der Guinea-Inseln. *Zeitschrift für*  
313 *Wissenschaftliche Zoologie* **42**, 423-458.
- 314 **Haddock, S. H. D. and Case, J. F.** (1999). Bioluminescence spectra of shallow and deep-sea  
315 gelatinous zooplankton: ctenophores, medusae and siphonophores. *Marine Biology* **133**, 571-582.
- 316 **Harvey, E. N.** (1952). Bioluminescence. New York: Academic Press.
- 317 **Hastings, J. W. and Morin, J.G.** (1991). Bioluminescence. In *Neural and integrative animal*  
318 *physiology*, vol. 3 (ed. C. L. Prosser), pp. 131-170. New York: Wiley-Liss.

- 319 **Herring, P. J. and Morin, J. G.** (1978). Bioluminescence in fishes. In *Bioluminescence in action*, pp.  
320 273-329.
- 321 **Huber, M. E., Arneson, C. A. and Widder, E. A.** (1989). Extremely blue bioluminescence in the  
322 polychaete *Polycirrus perplexus* (Terebellidae). *Bulletin of Marine Science* **44**, 1236-1239.
- 323 **Johnsen, S. and Widder, E. A.** (1998). Transparency and visibility of gelatinous zooplankton from  
324 the northwestern Atlantic and Gulf of Mexico. *The Biological Bulletin* **195**, 337-348.
- 325 **Krönström, J., Karlsson, W., Johansson, B. R. and Holmgren, S.** (2009). Involvement of  
326 contractile elements in control of bioluminescence in Northern krill, *Meganycitiphanes norvegica* (M.  
327 Sars). *Cell and Tissue Research* **336**, 299-308.
- 328 **Latz, M. I., Frank, T. M. and Case, J. F.** (1988). Spectral composition of bioluminescence of  
329 epipelagic organisms from the Sargasso Sea. *Marine Biology* **98**, 441-446.
- 330 **Malaquin, A. and Carin, F.** (1922). Tomopterides provenant des Campagnes de l'Hirondelle et de la  
331 Princesse-Alice 1888-1910. *Res. Camp. Sci. Prince Albert I de Monaco* **62**, 31-49.
- 332 **Martin, N. and Anctil, M.** (1984). Luminescence control in the tube-worm *Chaetopterus*  
333 *variopedatus*: role of nerve cord and photogenic gland. *The Biological Bulletin* **166**, 583-593.
- 334 **Miron, M. J., LaRivière, L., Bassot, J. M. and Anctil, M.** (1987). Immunohistochemical and  
335 radioautographic evidence of monoamine-containing cells in bioluminescent elytra of the scale-worm  
336 *Harmothoe imbricata* (Polychaeta). *Cell and Tissue Research* **249**, 547-556.
- 337 **Nicol, J. A. C.** (1952). Studies on *Chaetopterus variopedatus* (Renier). II. Nervous control of light  
338 production. *Journal of the Marine Biological Association of the United Kingdom* **30**, 433-452.
- 339 **Nicol, J. A. C.** (1954). The nervous control of luminescent responses in polynoid worms. *J. Mar. Biol.*  
340 *Ass. UK* **33**, 225-255.
- 341 **Nicol, J. A. C.** (1960). The regulation of light emission in animals. *Biological Reviews* **35**, 1-40.

- 342 **Nicolas, M.-T., Moreau, M. and Guerrier, P.** (1978). Indirect nervous control of luminescence in  
343 the polynoid worm *Harmothoe lunulata*. *Journal of Experimental Zoology* **206**, 427-433.
- 344 **Osborn, K. J., Haddock, S. H. D. and Rouse, G. W.** (2011). *Swima* (Annelida, Acrocirridae),  
345 holopelagic worms from the deep Pacific. *Zoological Journal of the Linnean Society* **163**, 663-678.
- 346 **Poupin, J., Cussatlegras, A. S. and Geistdoerfer, P.** (1999). Plancton marin bioluminescent :  
347 Inventaire documenté des espèces et bilan des formes les plus communes de la mer d'Iroise  
348 pp. 1-83: Laboratoire d'Océanographie de l'École Navale, Lanvéoc-Poulmic, France.
- 349 **Raskoff, K. A., Sommer, F. A., Hamner, W. M. and Cross, K. M.** (2003). Collection and culture  
350 techniques for gelatinous zooplankton. *The Biological Bulletin* **204**, 68-80.
- 351 **Ross, L. and Ross, B.** (2008). *Anaesthetic and Sedative Techniques for Aquatic Animals*: Wiley-  
352 Blackwell.
- 353 **Smaldon, G. and Lee, E. W.** (1979). *A Synopsis of Methods for the Narcotisation of Marine*  
354 *Invertebrates*. Edinburgh: Royal Scottish Museum.
- 355 **Tsuji, F. I. and Hill, E.** (1983). Repetitive cycles of bioluminescence and spawning in the polychaete,  
356 *Odontosyllis phosphorea*. *The Biological Bulletin* **165**, 444-449.
- 357 **Walker, R. J., Brooks, H. L. and Holden-Dye, L.** (1996). Evolution and overview of classical  
358 transmitter molecules and their receptors. *Parasitology* **113**, S3-S33.
- 359 **Wilkens, L. A. and Wolken, J. J.** (1981). Electroretinograms from *Odontosyllis enopla* (Polychaeta;  
360 Syllidae): initial observations on the visual system of the bioluminescent fireworm of Bermuda.  
361 *Marine & Freshwater Behaviour & Phy* **8**, 55-66.



| drug            |                                                         |                                               | concentration           |
|-----------------|---------------------------------------------------------|-----------------------------------------------|-------------------------|
| usual name      | commercial name                                         | pharmacology                                  | (mmol l <sup>-1</sup> ) |
| KCl             | potassium chloride                                      | depolarizing agent                            | 200                     |
| serotonin       | 5-hydroxytryptamine                                     | serotonergic neurotransmitter                 | 1                       |
| epinephrine     | (±)-epinephrine                                         | adrenergic neurotransmitter                   | 1                       |
| GABA            | gamma-aminobutyric acid                                 | GABAergic neurotransmitter and neuromodulator | 1                       |
| nitric oxide    | sodium nitroprusside                                    | guanylyl cyclase activator                    | 1                       |
| carbachol       | carbamoylcholine chloride                               | cholinergic agonist                           | 1                       |
| DMPP            | 1,1-dimethyl-4-phenyl-piperazinium iodide acetylcholine | nicotinic agonist                             | 1                       |
| acetylcholine   | chloride                                                | cholinergic neurotransmitter                  | 1                       |
| eserine         | eserine                                                 | cholinesterase inhibitor                      | 1                       |
| tubocurarine    | δ-tubocurarine chloride                                 | cholinergic nicotinic receptor antagonist     | 1                       |
| atropine        | atropine sulfate                                        | cholinergic muscarinic receptor antagonist    | 1                       |
| nifedipine      | nifedipine                                              | calcium channel blocker                       | 1                       |
| diltiazem       | diltiazem chloride                                      | calcium channel blocker                       | 1                       |
| trifluoperazine | trifluoperazine dihydrochloride                         | calmodulin inhibitor                          | 1                       |
| verapamil       | (±)-verapamil                                           | calcium channel blocker                       | 1                       |

| drug          | Low<br>(% RCI)   | p-value | n |
|---------------|------------------|---------|---|
| ASW (control) | 4.07 ± 4.22      |         | 6 |
| verapamil     | 18.58 ± 15.13    | 1.000   | 5 |
| epinephrine   | 53.71 ± 52.76    | 1.000   | 5 |
| GLBA          | 18.78 ± 18.60    | 1.000   | 5 |
| nitric oxide  | 89.40 ± 79.55    | 1.000   | 4 |
| carbachol     | 1129.88 ± 482.90 | 0.2839  | 5 |

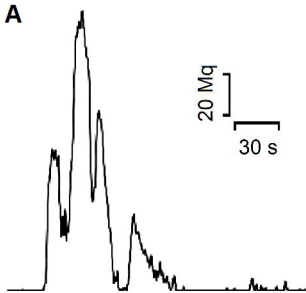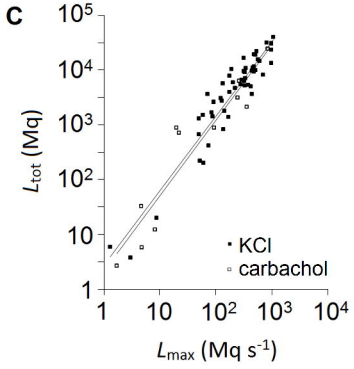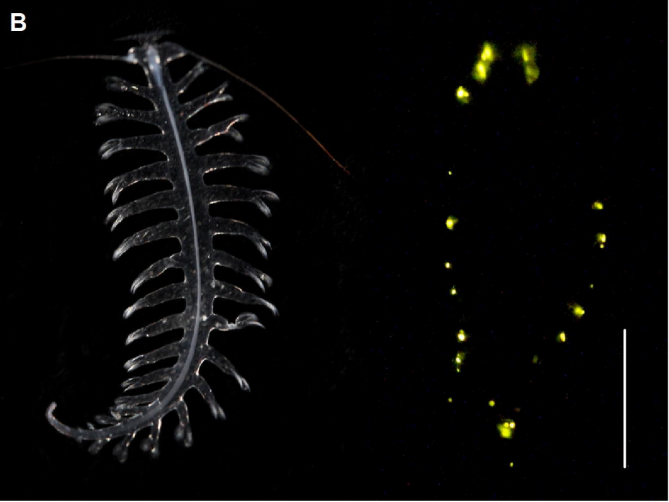

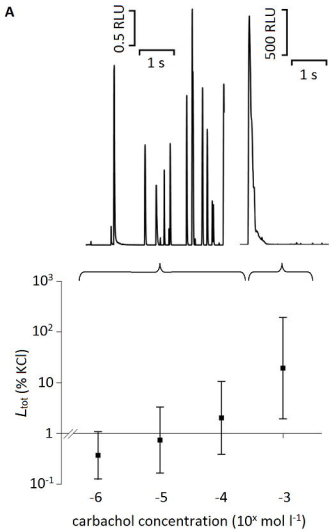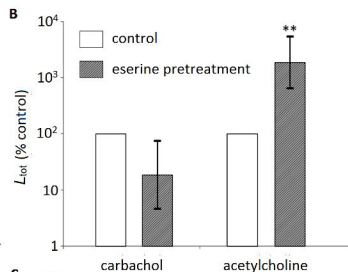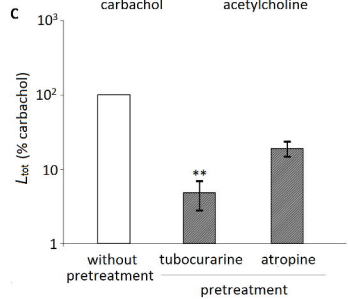

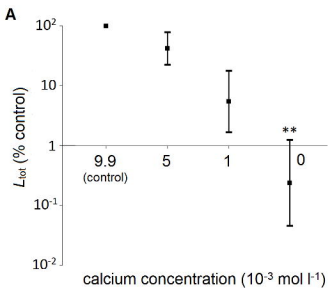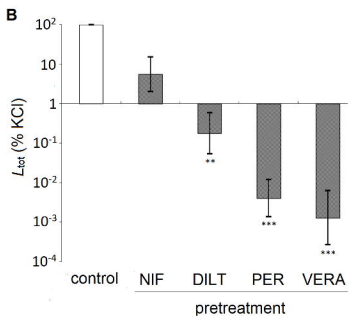

Source: https://cob.silverchair.com/jeb/article-pdf/doi/10.1242/jeb.090852/2037430/jeb_090852.pdf
